# Supplementary material
Source: Elsevier journal article supplement (https://drewscherer.angelfire.com/MMC02.pdf)
Supplement: MMC02 [file MMC02.pdf]

# News About Your Fairport Friends

Oscar Stenzel of Jefferson Ave. is now in Genesee Hospital recovering from an operation he had last Wednesday.

Mr. and Mrs. Thomas Lane, Buffalo, were week-end guests of Mr. and Mrs. Charles Payne, W. Church St.

Miss Josephine Porecca, Parco Ave., spent the week-end in New York City.

Mrs. Richard Cross, Rochester, spent a few days recently with her mother, Mrs. Margaret Monihan, S. Main St.

Little David Marsh, son of Mr. and Mrs. Harold Marsh of West Ave., who has been ill for the past few weeks, is reported to be improving slowly.

Mrs. Ada V. Clark, E. Church St., returned Sunday from LeRoy where she has been spending the past week.

Mr. and Mrs. Thomas Lane and daughter Louise of Buffalo have been visiting at the home of Mr. and Mrs. Charles Payne, W. Church St.

Thomas Aahby, a student at the University of Buffalo, was at home during the past week-end.

Mary Lou Allyn, Watson Rd., entertained the primary teachers of Raymond Baptist Church at a delicious dinner Friday evening, in honor of the approaching marriage of Kay Stevely.

Mr. and Mrs. Harold Wagner, So. Main St., will move shortly to an apartment at 33 Fourth Ave.

Mrs. Frank Young and daughter, Mrs. Raymond Kelley, East Ave., left Sunday for California, where they will visit cousins of the former. They plan to be away two months, and will visit several interesting places enroute.

Mrs. Emma Bauer has moved from 52 East Ave. to the home of her son, Earl Priest, 177 High St. Ext.

Herbert W. Gazley, So. Main St., was in Syracuse Saturday attending a conference of executives and salesmen of the firm of H. H. Sullivan, Inc., Rochester.

Mrs. Emma Cole and Mrs. Lorin Filkins of Fairport-Webster Rd. visited Mrs. Gladys Kraushaar of Rochester last Sunday.

Dr. and Mrs. James W. Welch, Dewey Ave., were guests on Sunday of Mr. and Mrs. Lester Pridgeon of LeRoy.

Miss Marian Dryer of Hornell spent the past week-end with her parents, Mr. and Mrs. O. W. Dryer, Dublin Rd.

Mrs. Frank Hohlman, Mrs. Mary Herbel, Mr. and Mrs. F. Hoffman and Charles Hohlman of Buffalo, Mrs. Joseph Washington and Mrs. Richard Burgstrom of Dunkirk were in town last Wednesday to attend the funeral of Louis J. Hess.

Laurence Bown Sr. is ill at his home on South Ave.

The Monday Club met this week for luncheon and bridge with Mrs. Charles Gibke, Ayrault Rd.

Mrs. C. J. Keene of Niagara Falls spent last week with her mother, Mrs. George O'Brien of Dewey Ave., who has been ill.

Mr. and Mrs. Edward S. Dodge and Mrs. Jane Dodge of Gasport were Sunday guests at the home of Mr. and Mrs. Frank Sweeney, East Church St.

Mrs. James Finnegan, Orchard St., has been ill at her home for the past week.

Mr. and Mrs. William Bulman Jr. and family and Mr. and Mrs. Donald Fellows visited Mr. and Mrs. Stanley Bulman and family, Turk Hill Rd., over the week-end.

Mrs. William Miller, Macedon, Mrs. Jennie Miller, Palmyra, and Mrs. George Hembrock, Fairport, were luncheon guests last Thursday of Mrs. Orlo Adams, W. Church St. The ladies were childhood friends.

Mrs. H. Lawrence Wells and her children of Albany are visiting her parents, Mr. and Mrs. Harry F. Van Horn, So. Main St.

Mr. and Mrs. Fred Morrow of South Ave. have moved to East Ave.

Douglas Anderson, Fourth Ave., is confined to his home because of illness.

Mr. and Mrs. Robert Bell, W. Church St., have moved to a house on the Five Mile Line Rd., Penfield.

Mrs. Nolan Granger of Jackson Pl. who has been in the General Hospital the past 10 days returned to her home Wednesday.

Miss Dorothy Gutacker, East Rochester, spent Saturday and Sunday with her sister and husband, Mr. and Mrs. Stanley Bulman and family, Turk Hill Rd.

Mrs. Ralph Rhoda who was taken quite ill a few days ago is resting comfortably now at her home on Summit St.

George Wagner, son of Mr. and Mrs. Harold Wagner, who will graduate in June from Lehigh University, has accepted a position with the Paul Dudley Company of Upper Montclair, N. J.

Mrs. George Hembrock is caring for Mrs. Orlo Adams while she is confined at home with an injured foot.

Frederick May, son of Mr. and Mrs. Walter May, East St., is spending a few days with his grandparents, Mr. and Mrs. Fred Bug of Atlantic Ave., Penfield.

George Filkins, son of Mr. and Mrs. Clarence Filkins, Hulbert Rd., has been able to be outdoors several times lately following a long illness.

J. Milton McMahon, So. Main St., is in St. Louis this week visiting the Purina Research Farm and Laboratory as a guest of the Ralston Purina Company. He is one of the more than 200 dealers who sell the Purina Company's products in the east.

Mr. and Mrs. John Miller were week-end guests of Mr. and Mrs. Carl Miller, West Ave. John is well remembered as one of Fairport's outstanding football players of a few years back. He and Mrs. Miller are on their way to visit John's mother in Bennington, Vt., and from there will start their long trek to California where they plan to make their home.

The Fairport Historical Club held a Silver Tea on Monday at the home of Mrs. Norman McEachren. Mrs. Dewey Jackson and Miss Floy Elliott read interesting papers on the subject of Non-Fiction Books. Mrs. Jackson's paper dealt with books of World War II and Miss Elliott chose books of travel and adventure as her subjects.

Services Held Monday For Frederick Maybee Sr. Funeral services for Frederick Maybee Sr., who was fatally injured when hit by an automobile in Main St. West, near Jefferson Ave., Rochester, last Friday night, were held Monday afternoon at the Van Horn Funeral Home. Rev. J. E. Dahlen officiated and burial was in Oakwood Cemetery.

Surviving are two sons, William and Frederick Jr., both of Fairport; four sisters, Mrs. Walter Tyler of Buffalo, Mrs. Herbert Lindsay of Rochester, Mrs. Eugene Faucet of East Rochester, Mrs. Charles Woodle of Boston; one brother, Charles of East Rochester; one granddaughter; several nieces and nephews.

## Engaged to Wed

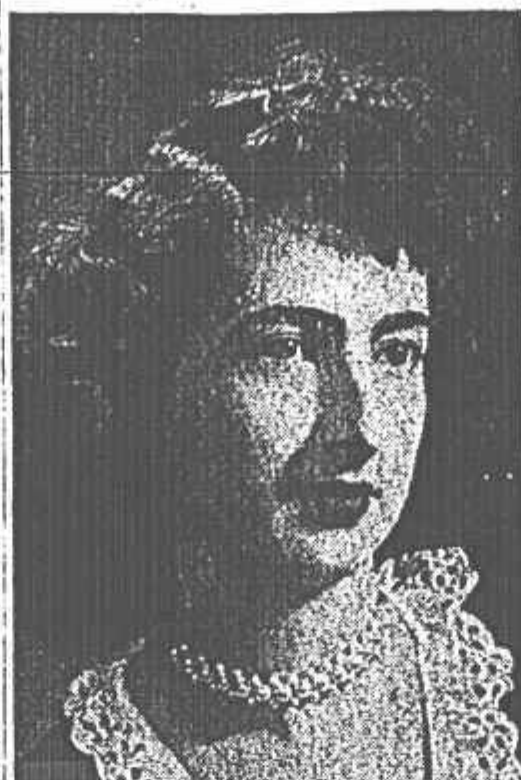

Mr. and Mrs. Earl Faust, E. Church St., have announced the engagement of their daughter, Dorothy Elizabeth, to Kenneth R. Anderson, son of Mr. and Mrs. George Anderson of East Rochester. No date for the wedding has been set.

Miss Faust is a graduate of Fairport High School, class of 1945.

## To Wed March 29

Invitations have been received for the wedding of Ronald Macomber, nephew of Mr. and Mrs. Laurence Bown, South Ave., to Harriet Elizabeth Hathaway. The wedding is to take place at the Presbyterian Church in Upper Montclair, N. J. on March 29. Mr. and Mrs. Bown and family will attend.

## Happy Parents

A daughter was born on March 14 to Mr. and Mrs. George Miller of Macedon Center. Mrs. Miller is the daughter of Mr. and Mrs. Roy Aldridge, N. Main St.

Mr. and Mrs. Walter May, East St., are the parents of a baby boy, Stanley Walter, born March 17 at the Rochester General Hospital. He tipped the scales at 9 pounds, 2 ounces.

Mr. and Mrs. Gordon DeWitt, West Ave., welcomed the arrival on March 14 of a son, Larry Robert, weighing 6 pounds, 15 ounces, and born in General Hospital.

Lt. Col. and Mrs. Seneca W. Foote of Santa Fe, New Mexico, are the proud parents of a son, Seneca Stanley, born on March 7. Colonel Foote is the son of Mr. and Mrs. Seneca Foote who reside on the Victor-Pittsford Rd. Mrs. Foote is the former Phyllis White of Adelaide, Australia.

Mr. and Mrs. Thomas Loughney, Dewey Ave., welcomed the arrival on March 12 of a new daughter, Patricia Ann.

## Recent Events at Potter Memorial

Mrs. Harry Bridges of Roselawn Ave. entertained a group of friends on Saturday evening.

Tuesday evening St. Mary's Guild had a tureen supper followed by a business meeting. At the meeting the following officers were elected: President, Mrs. Rose Harloff; 1st vice-president, Mrs. Margaret Sweeney; 2nd vice-president, Mrs. Lenora Murphy; secretary, Miss Josephine Porecca; treasurer, Mrs. Anna Hartigan.

On Tuesday afternoon the Orthopedic Clinic, under the auspices of the New York State Board of Health, was conducted under the direction of Dr. Crawford, for patients in this district recommended to the clinic by their physicians.

Wednesday, the Oak Circle of the Congregational Church entertained at its regular monthly dessert luncheon. Mrs. Edward Surrey and Mrs. Ward acted as hostesses.

## Local Organizations Announce Activities

Perinton Home Bureau will have the third lesson in the current series on Foods under the leadership of Mrs. Gears and Mrs. Appleton on Thursday, March 27 at 11:00 a. m. at Potter Memorial. Members may telephone reservations to either Fairport 463 or 365.

Perinton Historical Society will meet Tuesday evening, March 25 at 8 o'clock at Potter Memorial. Mrs. Cornelia Kraal will be the speaker.

Mrs. Lillian Dixon, Filkins St., will be hostess next Tuesday evening to the Past Noble Grand of the Past Noble Grand Club of Rozella Rebekah Lodge.

## APPRECIATION

I want to thank all my friends and neighbors for cards and acts of kindness shown me during my illness.

Mrs. Emma Bauer

I wish to thank all my friends and neighbors for the gifts, cards, candy and flowers I received during my stay at the hospital.

Mrs. Colin Scott

I wish to thank my friends and neighbors for cards and flowers and many other kindnesses shown me during my stay in the hospital and at home.

Mrs. Effie Smith, Water Street

## CARD OF THANKS

We wish to express our sincere appreciation to neighbors, friends, the Fire Department, the Board of Education and school pupils for flowers, cards and other kindnesses shown us at the time of our recent bereavement.

Mrs. Louis J. Hess  
Mr. and Mrs. Elmer Hess

## King's Quality Grocery

Meats — Groceries  
Fruits — Vegetables  
FAIRPORT RD.  
COR. JEFFERSON AVE.  
We Deliver All Orders  
Over \$1.00  
Open All Day Wednesdays  
Until 8 o'clock  
Open Saturdays Until 8 o'clock  
Phone Fairport 393

## WARNING

SALT will injure the finish of Your Car —

Bring it in for a Power-Wash.

HUPP MOTORS INC.

Fairport

## Give Jewelry This Easter

WE SUGGEST

All Gold Filled

LADIES' GENUINE CAMEO BROOCHES  
PINS — NECKLACES

GENTS' TIE FITTINGS

Bars — \$1.00 Tie Holder — \$1.50 Sets — \$2.50  
KEY CHAINS — \$1.50 up

## CLINTON RUSSELL

20 Pleasant St. Fairport Phone 264-M

## Pretty Lingerie FOR YOUR Easter Outfit

The fashions you'll wear this Spring will be a liting melody of grace and gentle, feminine appeal. We have just the clothes you need to make you look ever so pretty.

A Few Suggestions from Our Store . . .

Gowns — Slips

Negligees

Hosiery —

In silk, rayon and nylon

Rayotex Panties and

Vests (Rayon)

You'll want to see and buy one or more of our new

SPRING DRESSES

We are showing a large assortment for your discriminating taste.

## Adams Dress and Gift Shop

30 South Main Street

Phone 433-J

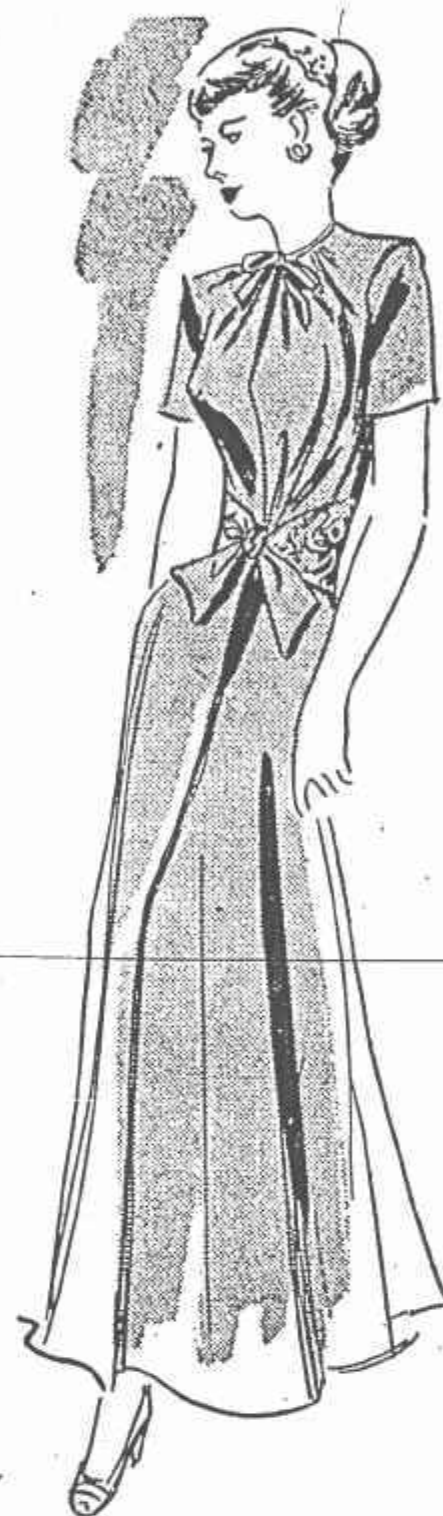

## ANNUAL FISH SUPPER

WEST WALWORTH EVANGELICAL CHURCH

Sponsored by

YOUNG MARRIED PEOPLE'S CLASS

FRIDAY, MARCH 28

6 P. M. 'til

Adults — \$1.25

Children under 12 — 65c

## POCKET BILLIARDS

Enjoy Your Old Pastime

NOW OPEN

TO THE PUBLIC

## Pete LaRosa

25 State St.

Fairport

Phone 324

## See Our Complete Selection of HALLMARK

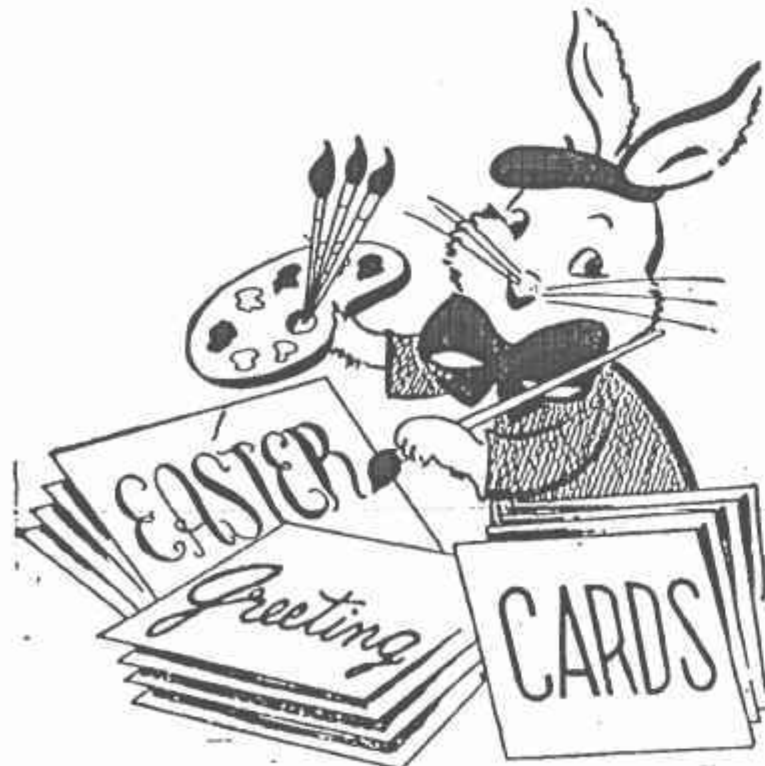

JOHNSON'S and SCHAFFT'S CHOCOLATES

EASTER NOVELTIES  
AND BASKETS

25c and up

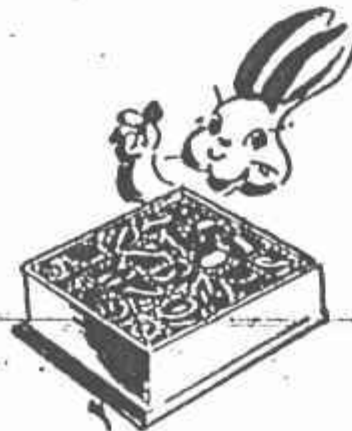

## Wagor Drug Co.

28 So. Main St. Fairport, N. Y. Phone 50

Miller's  
TAXI

Phone Fairport 154-J

— 24 Hour Service —

## Send Flowers This Easter

PLACE YOUR ORDER EARLY

Easter Corsages Novelties  
Cut Flowers  
Lilies Tulips Hyacinths  
Baby Ramblers  
Hydrangeas Cinerarias  
Azaleas Primroses

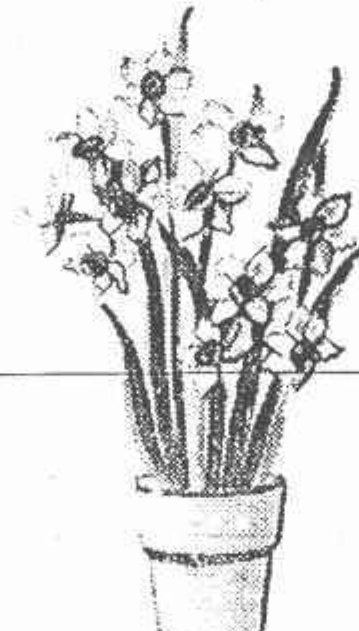

## Bartolotta Bros.

49 STATE ST. FAIRPORT

Phone 177 — We Deliver

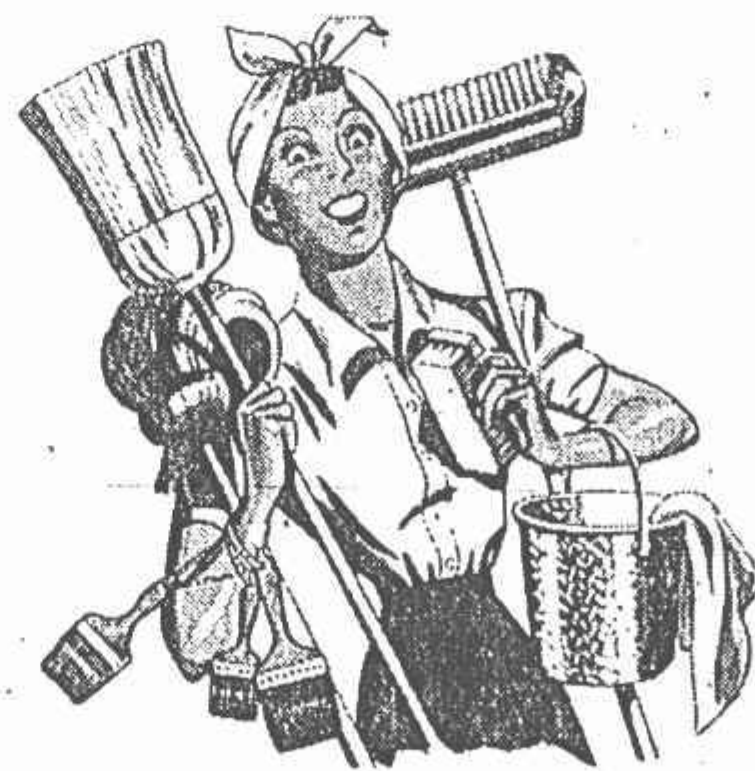

## Spring Clean-Up Helpers

Here are household tools to lighten your spring chores! Brooms, mops, pails, brushes — all the aids you need for a real Spring cleaning session — at economy prices that will save you money! Next time you're near our store, plan to come in and stock up, so these household helpers will be right on hand for active duty.

## Fairport Hardware Co.

Your Dealer

Successor to

J. M. BAHLER HARDWARE

20 West Ave.

Fairport

Phone 34

## No City High Rent!

One Reason . . .  
We Have Better Values

## BOOTS

STORM

KING

5.95

26 inches tall!  
Sturdy black  
rubber — made  
to wear! Sizes  
7 to 11.

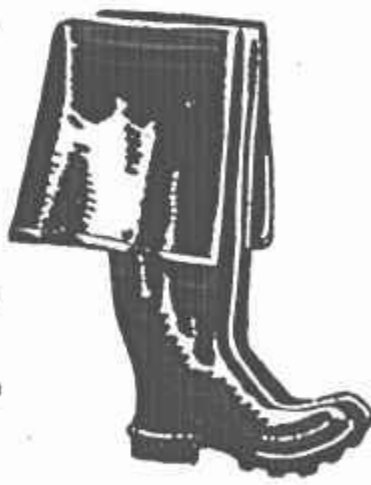

KNEE

3.95

KHAKI, HIP

7.95

This is the fishing  
boot. Sponge insole!  
Knee straps! Thick  
tire-type tread! Pliable  
khaki rubber —  
made from new crudel!

Plow through mud —  
or wash the car!  
Tough black rubber  
for rough wear.

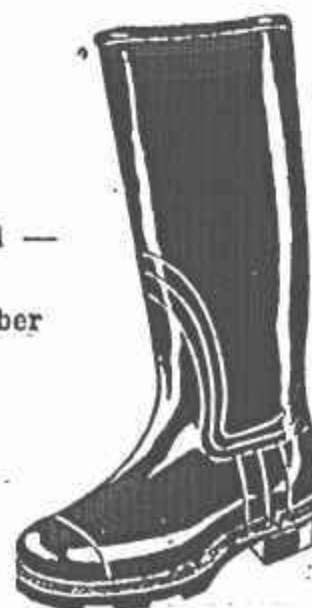

## SAYLES'

9 S. MAIN ST.

FAIRPORT

The Herald-Mail is the Weekly  
Record of Life in Your Community
